# Supplementary material for: Identification of SNPs and InDels associated with berry size in table grapes integrating genetic and transcriptomic approaches
Source: PubMed Central journal article supplement (PMC7397606; doi:10.1186/s12870-020-02564-4), 2020-08-03

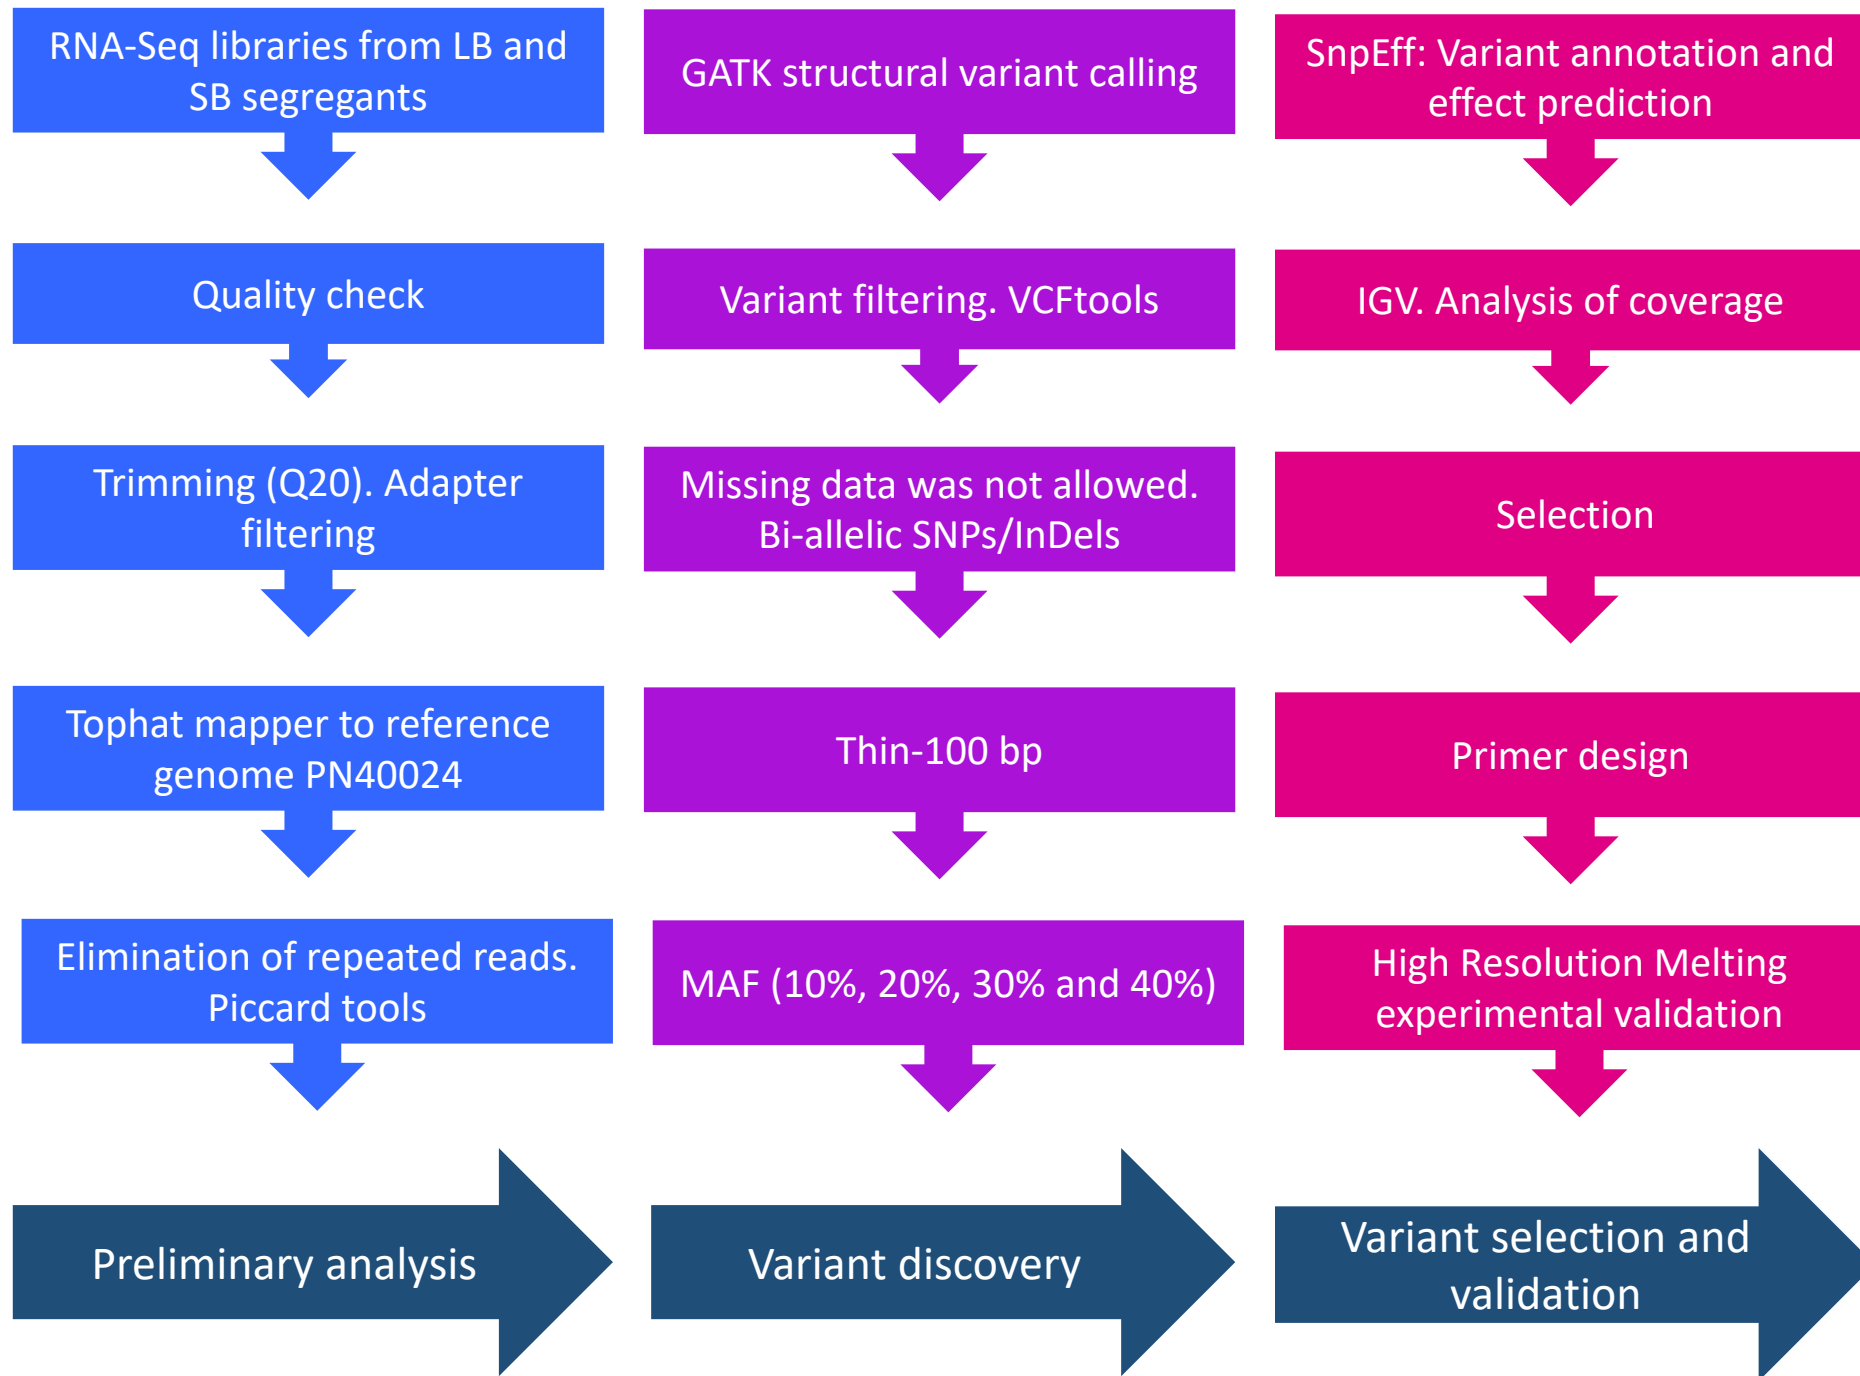

Supplement: 12870_2020_2564_MOESM2_ESM.pdf [file 12870_2020_2564_MOESM2_ESM.pdf]
