# Supplementary material for: Identification of SNPs and InDels associated with berry size in table grapes integrating genetic and transcriptomic approaches
Source: PubMed Central journal article supplement (PMC7397606; doi:10.1186/s12870-020-02564-4), 2020-08-03

SNP density (SNPs/Kb)

Chr

InDel density (InDels/Kb)

Un

9

8

7

6

5

4

3

2

19

18

17

16

15

14

13

12

11

10

1

2.0

1.5

1.0

0.5

0.0

0.0

0.1

0.2

0.3

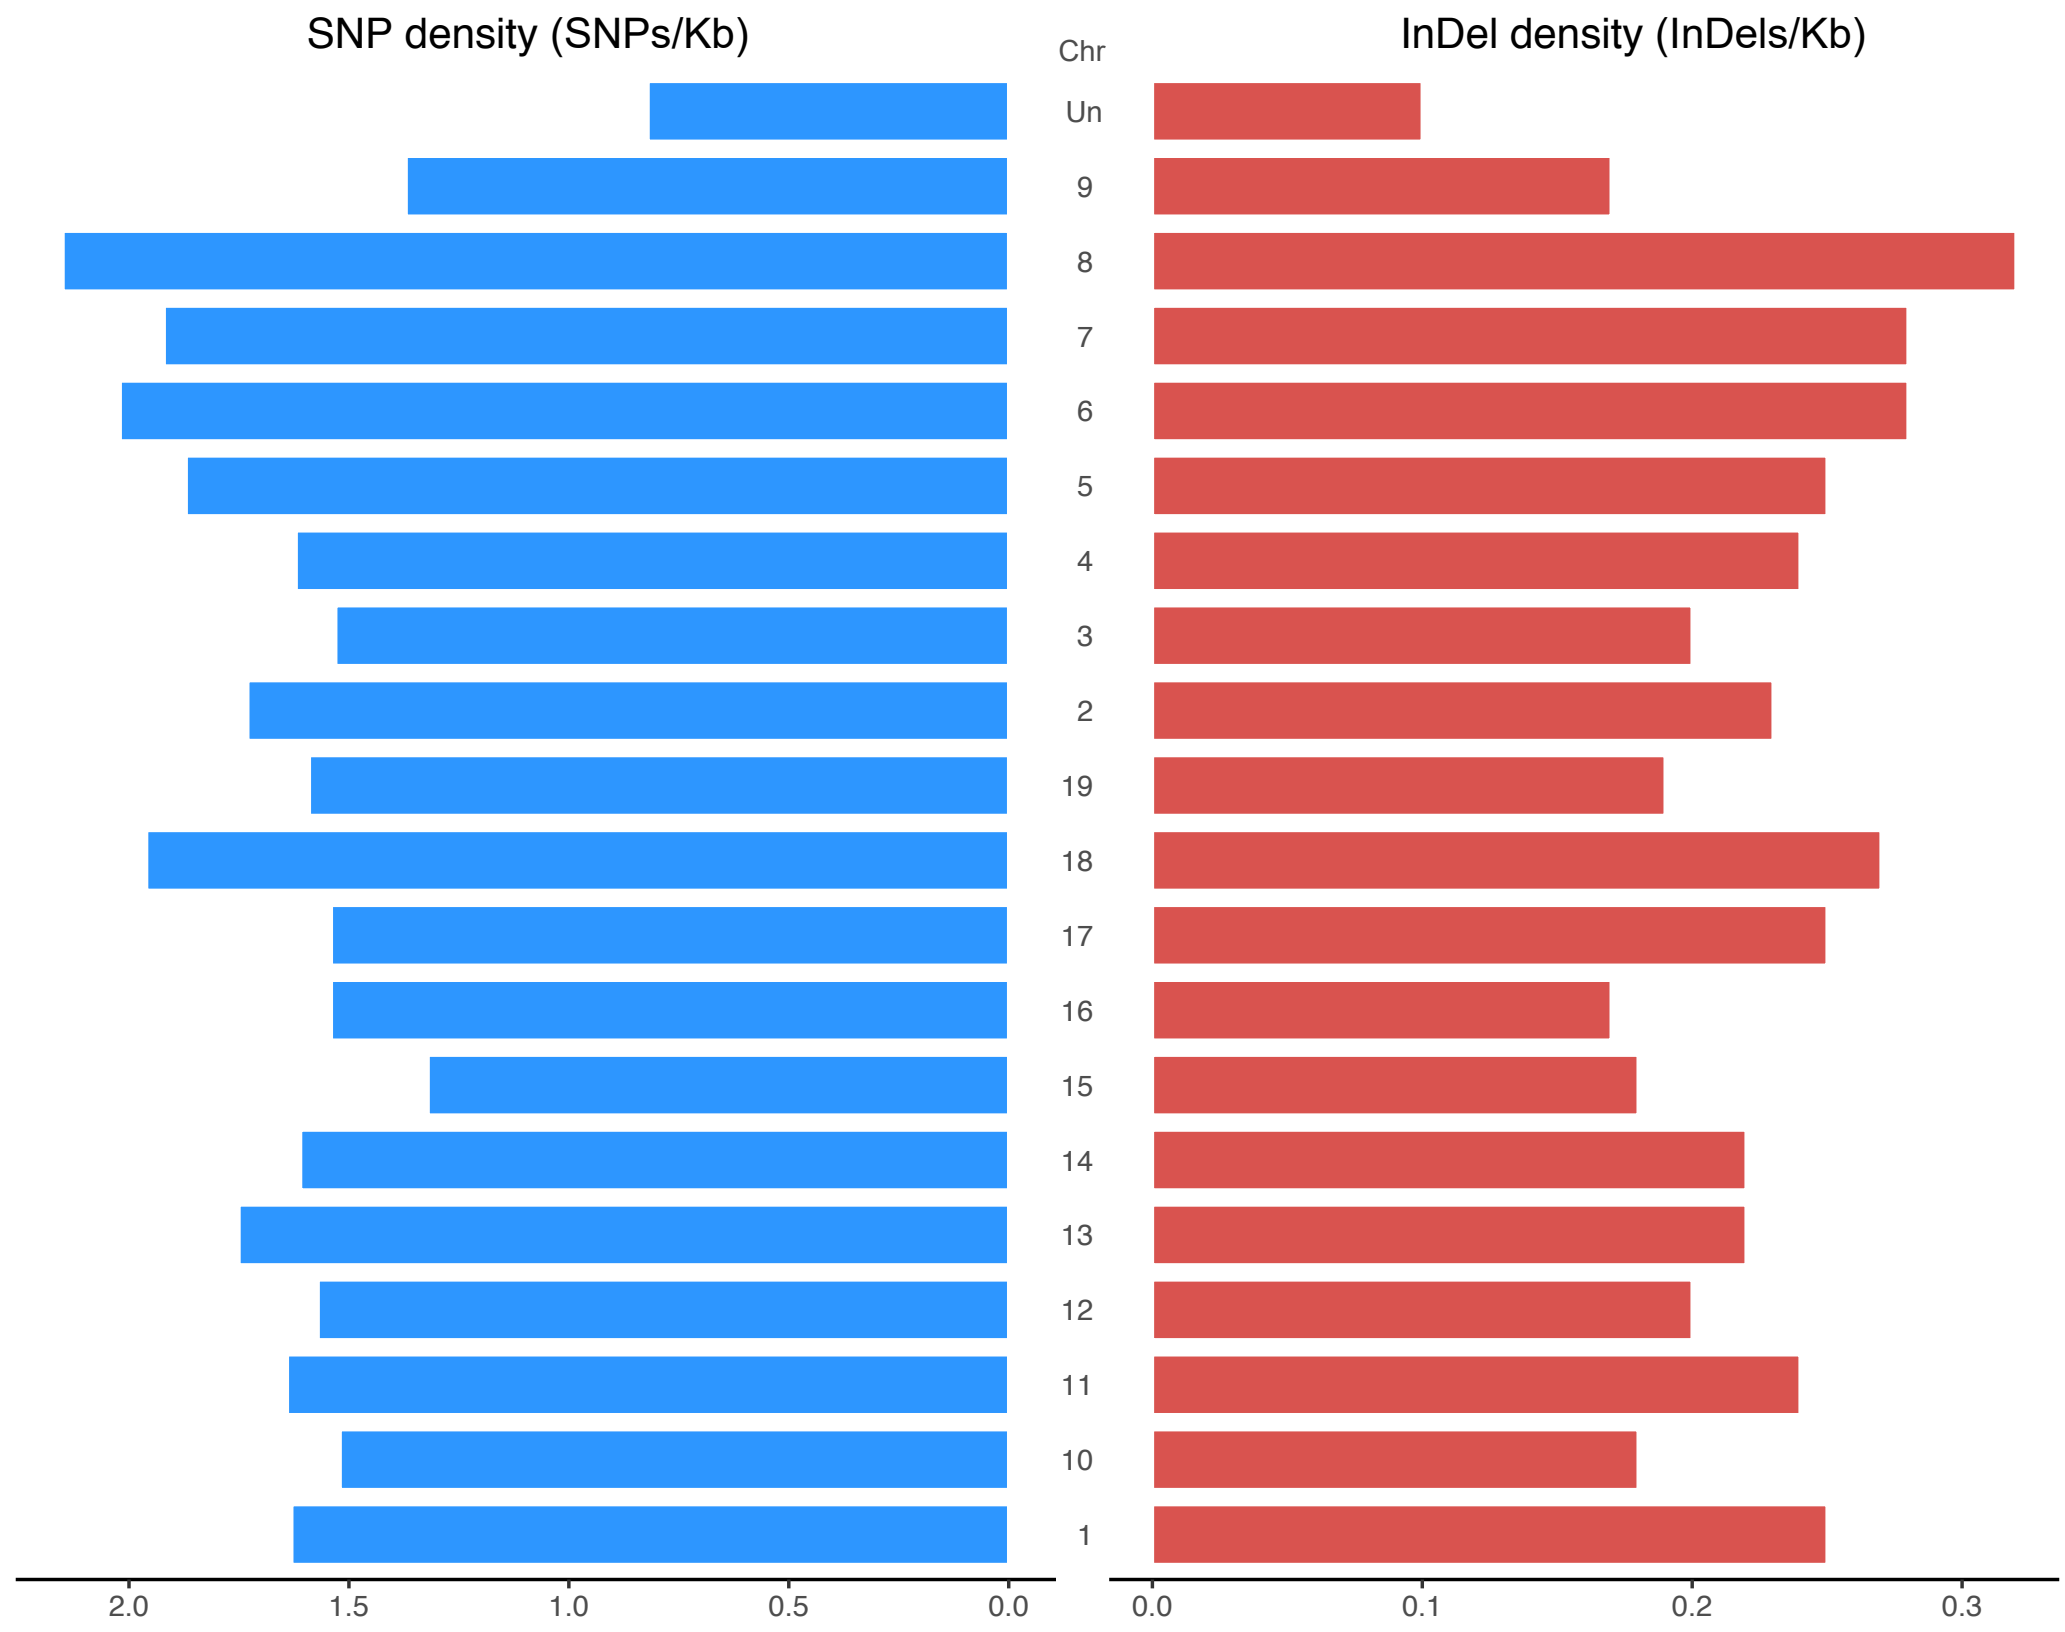

Supplement: 12870_2020_2564_MOESM6_ESM.pdf [file 12870_2020_2564_MOESM6_ESM.pdf]
